# Supplementary material for: Kinetic study ofo-nitrotoluene nitration in a homogeneously continuous microflow
Source: Royal Society of Chemistry journal article supplement (doi:10.1039/d1re00362c), 2021-09-28
Supplement: d1re00362c1.pdf [file d1re00362c1.pdf]

## Supporting Information

### Kinetic Study of *o*-Nitrotoluene Nitration in a Homogeneously Continuous Microflow

Jing Song<sup>1</sup>, Yongjin Cui<sup>1</sup>, Guangsheng Luo, Jian Deng\*, and Yujun Wang\*

State Key Laboratory of Chemical Engineering, Department of Chemical Engineering,

Tsinghua University, Beijing 100084, China

\*Corresponding authors' email: wangyujun@tsinghua.edu.cn,  
jiandeng@tsinghua.edu.cn

**Number of pages: 5**

**Number of Tables: 3**

**Number of Figure: 1**

#### Table of Content

**Table S1.** Values and 95 % confidence intervals of  $k_1$  at different temperatures and  $\text{H}_2\text{SO}_4$  mass fractions.

**Table S2.** Values of  $M_c$  and  $\lg\left(\frac{c_{\text{NO}_2^+}}{c_{\text{HNO}_3}}\right)$  under different temperatures and  $\text{H}_2\text{SO}_4$  mass fraction.

**Table S3.** Values of  $nM_c$  and  $\lg\left(\frac{c_{\text{NO}_2^+}}{c_{\text{HNO}_3}}\right) + \lg k_2$  under different temperatures and  $\text{H}_2\text{SO}_4$  mass fraction.

**Figure S1.** The detailed high-resolution photograph of the flow setup.

**Table S1.** Values and 95 % confidence intervals of  $k_1$  at different temperatures and H<sub>2</sub>SO<sub>4</sub> mass fractions.

| Mass fraction of H <sub>2</sub> SO <sub>4</sub> (%) | Temperature (°C) | $k_1 \times 10^2$ (L mol <sup>-1</sup> s <sup>-1</sup> ) |
|-----------------------------------------------------|------------------|----------------------------------------------------------|
| 88                                                  | 10               | 42.38                                                    |
|                                                     | 15               | 63.29                                                    |
|                                                     | 20               | 81.01                                                    |
|                                                     | 25               | 100.15                                                   |
| 90                                                  | 10               | 60.19                                                    |
|                                                     | 15               | 70.01                                                    |
|                                                     | 20               | 100.64                                                   |
|                                                     | 25               | 133.89                                                   |
| 92                                                  | 10               | 66.76                                                    |
|                                                     | 15               | 76.52                                                    |
|                                                     | 20               | 135.10                                                   |
|                                                     | 25               | 196.42                                                   |
| 94                                                  | 10               | 60.32                                                    |
|                                                     | 15               | 87.48                                                    |
|                                                     | 20               | 123.87                                                   |
|                                                     | 25               | 161.91                                                   |

**Table S2.** Values of  $M_c$  and  $\lg\left(c_{\text{NO}_2^+}/c_{\text{HNO}_3}\right)$  under different temperatures and  $\text{H}_2\text{SO}_4$  mass fraction.

| Mass fraction of $\text{H}_2\text{SO}_4$ (%) | Temperature ( $^{\circ}\text{C}$ ) | $\lg\left(c_{\text{NO}_2^+}/c_{\text{HNO}_3}\right)$ | $M_c$   |
|----------------------------------------------|------------------------------------|------------------------------------------------------|---------|
| 88                                           | 10                                 | 0.1707                                               | -12.353 |
|                                              | 15                                 | 0.1075                                               | -12.211 |
|                                              | 20                                 | 0.0406                                               | -12.070 |
|                                              | 25                                 | -0.0241                                              | -11.930 |
| 90                                           | 10                                 | 0.9320                                               | -12.893 |
|                                              | 15                                 | 0.8568                                               | -12.745 |
|                                              | 20                                 | 0.7841                                               | -12.597 |
|                                              | 25                                 | 0.7138                                               | -12.450 |
| 92                                           | 10                                 | 1.6870                                               | -13.432 |
|                                              | 15                                 | 1.6058                                               | -13.278 |
|                                              | 20                                 | 1.5273                                               | -13.124 |
|                                              | 25                                 | 1.4515                                               | -12.971 |
| 94                                           | 10                                 | 2.4418                                               | -14.013 |
|                                              | 15                                 | 2.3546                                               | -13.852 |
|                                              | 20                                 | 2.2705                                               | -13.691 |
|                                              | 25                                 | 2.1891                                               | -13.532 |

**Table S3.** Values of  $nM_c$  and  $\lg\left(\frac{c_{\text{NO}_2^+}}{c_{\text{HNO}_3}}\right) + \lg k_2$  under different temperatures and  $\text{H}_2\text{SO}_4$  mass fraction.

| Mass fraction of $\text{H}_2\text{SO}_4$ (%) | Temperature (°C) | $\lg\left(\frac{c_{\text{NO}_2^+}}{c_{\text{HNO}_3}}\right) + \lg k_2$ | $nM_c$  |
|----------------------------------------------|------------------|------------------------------------------------------------------------|---------|
| 88                                           | 10               | 15.797                                                                 | -16.146 |
|                                              | 15               | 15.965                                                                 | -16.144 |
|                                              | 20               | 16.139                                                                 | -16.066 |
|                                              | 25               | 16.271                                                                 | -16.141 |
| 90                                           | 10               | 16.559                                                                 | -16.851 |
|                                              | 15               | 16.714                                                                 | -16.849 |
|                                              | 20               | 16.883                                                                 | -16.767 |
|                                              | 25               | 17.009                                                                 | -16.846 |
| 92                                           | 10               | 17.314                                                                 | -17.556 |
|                                              | 15               | 17.463                                                                 | -17.554 |
|                                              | 20               | 17.626                                                                 | -17.469 |
|                                              | 25               | 17.747                                                                 | -17.550 |
| 94                                           | 10               | 18.068                                                                 | -18.315 |
|                                              | 15               | 18.212                                                                 | -18.313 |
|                                              | 20               | 18.370                                                                 | -18.224 |
|                                              | 25               | 18.485                                                                 | -18.309 |

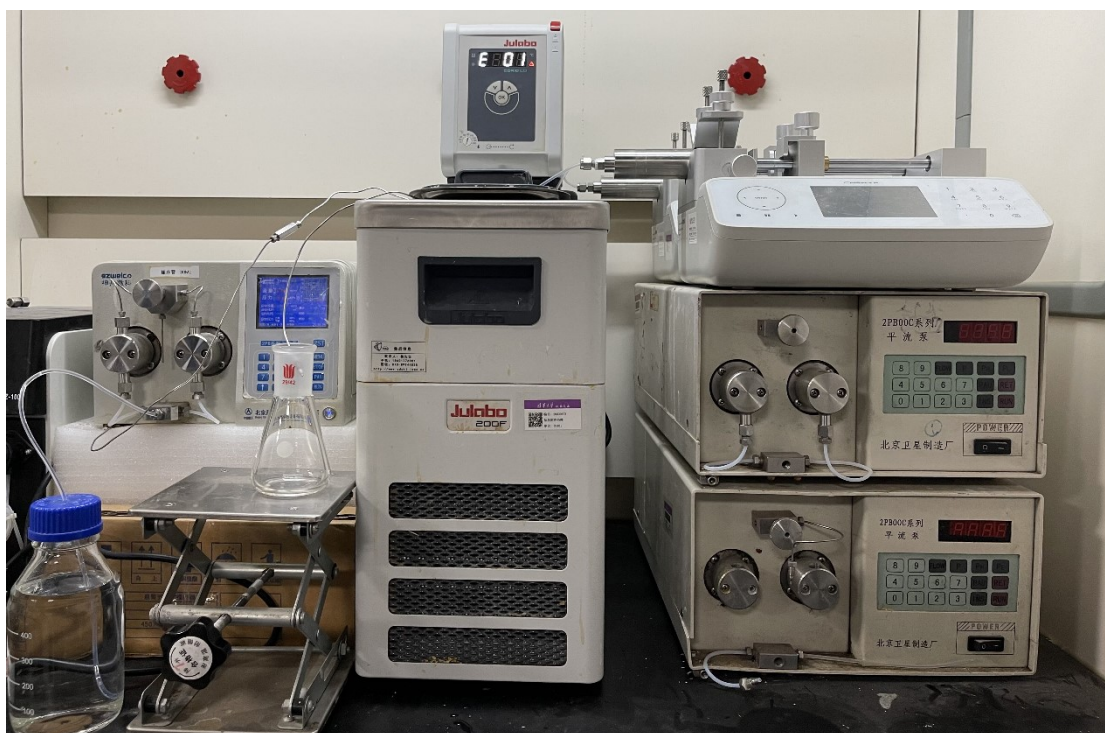

**Figure S1.** The detailed high-resolution photograph of the flow setup.
